# Supplementary material
Source: PubMed Central journal article supplement (PMC6714056)
Supplement: NIHMS1031278-supplement-1.pdf [file NIHMS1031278-supplement-1.pdf]

**Supplementary Table 1. The numerical analysis of all cells and positive cells.**

|                  | iNap1-Cyt  |            |                         |                  | SoNar-Cyt |            |                         |
|------------------|------------|------------|-------------------------|------------------|-----------|------------|-------------------------|
|                  | Positive   | All Events | Positive Percentage (%) |                  | Positive  | All Events | Positive Percentage (%) |
| <b>Resting</b>   | 835        | 50000      | 1.67                    | <b>Resting</b>   | 7884      | 100000     | 7.88                    |
|                  | 835        | 50000      | 1.67                    |                  | 7730      | 100000     | 7.73                    |
|                  | 754        | 50000      | 1.51                    |                  | 8211      | 100000     | 8.21                    |
| <b>Activated</b> | 1683       | 50000      | 3.37                    |                  | 4076      | 100000     | 4.08                    |
|                  | 1490       | 50000      | 2.98                    | <b>Activated</b> | 2760      | 100000     | 2.76                    |
|                  | 1613       | 50000      | 3.23                    |                  | 1777      | 68052      | 2.61                    |
|                  |            |            |                         |                  | 3853      | 96427      | 4.00                    |
|                  |            |            |                         |                  | 3089      | 100000     | 3.09                    |
|                  | roGFPI-Cyt |            |                         |                  | HyPer-Cyt |            |                         |
|                  | Positive   | All Events | Positive Percentage (%) |                  | Positive  | All Events | Positive Percentage (%) |
| <b>Resting</b>   | 2278       | 100000     | 2.28                    | <b>Resting</b>   | 1025      | 100000     | 1.03                    |
|                  | 2245       | 100000     | 2.25                    |                  | 976       | 100000     | 0.98                    |
|                  | 2221       | 100000     | 2.22                    |                  | 999       | 100000     | 1.00                    |
|                  | 681        | 50000      | 1.36                    |                  | 5817      | 100000     | 5.82                    |
| <b>Activated</b> | 1282       | 100000     | 1.28                    |                  | 5748      | 100000     | 5.75                    |
|                  | 1542       | 100000     | 1.54                    |                  | 5670      | 100000     | 5.67                    |
|                  | 1479       | 100000     | 1.48                    |                  | 6098      | 100000     | 6.10                    |
|                  | 481        | 50000      | 0.96                    | <b>Activated</b> | 1372      | 100000     | 1.37                    |
|                  |            |            |                         |                  | 1407      | 100000     | 1.41                    |
|                  |            |            |                         |                  | 1336      | 100000     | 1.34                    |
|                  |            |            |                         |                  | 5441      | 100000     | 5.44                    |
|                  |            |            |                         |                  | 5072      | 100000     | 5.07                    |
|                  |            |            |                         |                  | 4640      | 100000     | 4.64                    |
|                  |            |            |                         |                  | 5090      | 100000     | 5.09                    |
|                  | iNap3-Mit  |            |                         |                  | Frex-Mit  |            |                         |
|                  | Positive   | All Events | Positive Percentage (%) |                  | Positive  | All Events | Positive Percentage (%) |
| <b>Resting</b>   | 2700       | 100000     | 2.70                    | <b>Resting</b>   | 716       | 100000     | 0.72                    |
|                  | 3100       | 100000     | 3.10                    |                  | 818       | 100000     | 0.82                    |
|                  | 2610       | 100000     | 2.61                    |                  | 496       | 100000     | 0.50                    |
|                  | 3083       | 100000     | 3.08                    |                  | 890       | 100000     | 0.89                    |
| <b>Activated</b> | 3134       | 89984      | 3.48                    |                  | 700       | 100000     | 0.70                    |
|                  | 3142       | 97811      | 3.21                    | <b>Activated</b> | 1220      | 49739      | 2.45                    |
|                  | 3120       | 77246      | 4.04                    |                  | 1617      | 64015      | 2.53                    |
|                  | 3116       | 88844      | 3.51                    |                  | 1071      | 77915      | 1.37                    |
|                  |            |            |                         |                  | 1129      | 60665      | 1.86                    |

|           |            |            |                         |           |           |            |                         |
|-----------|------------|------------|-------------------------|-----------|-----------|------------|-------------------------|
|           |            |            |                         |           | 1150      | 82274      | 1.40                    |
|           | roGFP1-Mit |            |                         |           | HyPer-Mit |            |                         |
|           | Positive   | All Events | Positive Percentage (%) |           | Positive  | All Events | Positive Percentage (%) |
| Resting   | 7671       | 88182      | 8.70                    | Resting   | 2547      | 95385      | 2.67                    |
|           | 6557       | 61765      | 10.62                   |           | 2383      | 91044      | 2.62                    |
|           | 6170       | 63818      | 9.67                    |           | 2122      | 71043      | 2.99                    |
|           | 6608       | 60780      | 10.87                   |           | 3249      | 100000     | 3.25                    |
| Activated | 5098       | 77811      | 6.55                    |           | 3493      | 100000     | 3.49                    |
|           | 5334       | 83305      | 6.40                    | Activated | 3104      | 70306      | 4.41                    |
|           | 5223       | 86465      | 6.04                    |           | 2374      | 57691      | 4.12                    |
|           | 5253       | 91349      | 5.75                    |           | 2629      | 70957      | 3.71                    |
|           |            |            |                         |           | 3147      | 100000     | 3.15                    |
|           |            |            |                         |           | 2932      | 100000     | 2.93                    |
|           | iNapc-Cyt  |            |                         |           | cpYFP-Cyt |            |                         |
|           | Positive   | All Events | Positive Percentage (%) |           | Positive  | All Events | Positive Percentage (%) |
| Resting   | 703        | 50000      | 1.41                    | Resting   | 4428      | 100000     | 4.43                    |
|           | 750        | 50000      | 1.50                    |           | 4457      | 100000     | 4.46                    |
|           | 738        | 50000      | 1.48                    |           | 4446      | 100000     | 4.45                    |
|           | 2925       | 100000     | 2.93                    |           | 4450      | 100000     | 4.45                    |
| Activated | 1263       | 50000      | 2.53                    | Activated | 3232      | 100000     | 3.23                    |
|           | 1217       | 50000      | 2.43                    |           | 3627      | 100000     | 3.63                    |
|           | 1346       | 50000      | 2.69                    |           | 3426      | 100000     | 3.43                    |
|           | 1772       | 100000     | 1.77                    |           | 3436      | 100000     | 3.44                    |
|           | iNapc-Mit  |            |                         |           | cpYFP-Mit |            |                         |
|           | Positive   | All Events | Positive Percentage (%) |           | Positive  | All Events | Positive Percentage (%) |
| Resting   | 2019       | 100000     | 2.02                    | Resting   | 2101      | 98159      | 2.14                    |
|           | 2042       | 100000     | 2.04                    |           | 1769      | 91440      | 1.93                    |
|           | 2001       | 100000     | 2.00                    |           | 2046      | 92747      | 2.21                    |
|           | 2046       | 100000     | 2.05                    |           | 1859      | 86712      | 2.14                    |
| Activated | 2324       | 100000     | 2.32                    |           | 1927      | 100000     | 1.93                    |
|           | 1938       | 100000     | 1.94                    | Activated | 2009      | 87981      | 2.28                    |
|           | 2336       | 81963      | 2.85                    |           | 1811      | 94156      | 1.92                    |
|           | 1937       | 93250      | 2.08                    |           | 1981      | 79906      | 2.48                    |
|           |            |            |                         |           | 1953      | 90729      | 2.15                    |
|           |            |            |                         |           | 1399      | 80750      | 1.73                    |

**Note :** Quantitative data for cytosolic or mitochondrial sensor fluorescence were obtained from three or more independent assessments by flow cytometry.
